# Supplementary material for: Connecting charge transfer kinetics to device parameters of a narrow-bandgap polymer-based solar cell
Source: Royal Society of Chemistry journal article supplement (doi:10.1039/c6cp04688f), 2016-01-01
Supplement: c6cp04688f1.pdf [file c6cp04688f1.pdf]

## Connecting Charge Transfer Kinetics to Device Parameters of a Narrow-bandgap Polymer-based Solar Cell

Jongwoo Song<sup>a</sup>, Younah Lee<sup>a</sup>, Boa Jin<sup>a</sup>, Jongdeok An<sup>b</sup>, Hyunmin Park<sup>a</sup>, Hoon Park<sup>b</sup>, Myounghee Lee<sup>b</sup> and Chan Im<sup>a, b, \*</sup>

### Supplementary Information

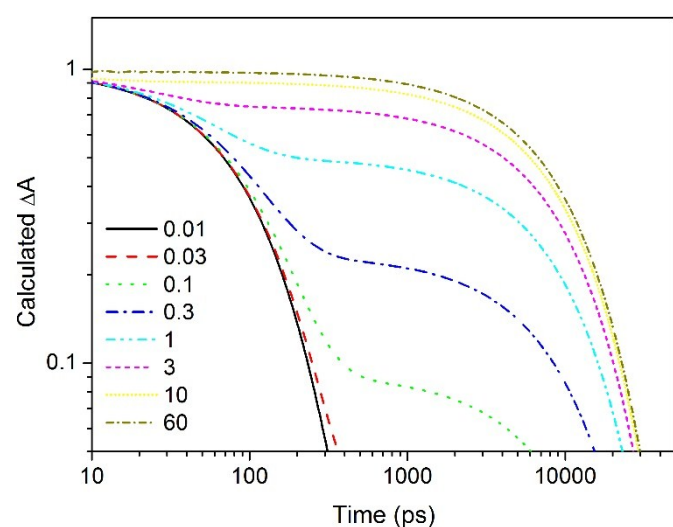

Figure S1. Numerically calculated TAS kinetics for the time range from 10 ps up to 60 ns. Used data set was the same as that used in Figure 11.
